# Supplementary material for: Multilayer microfluidic devices created from a single photomask
Source: Royal Society of Chemistry journal article supplement (doi:10.1039/c3ra43732a), 2013-01-01
Supplement: c3ra43732a.pdf [file c3ra43732a.pdf]

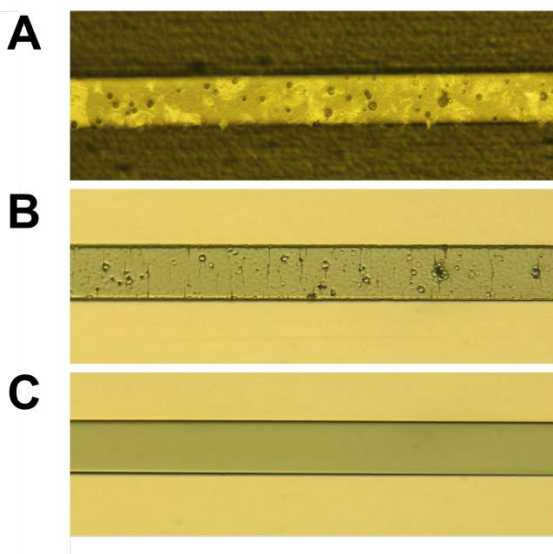

**ESI Figure 1.** Channel roughness resulting from photoplot masks. (A) Photograph of a 100- $\mu\text{m}$ -wide channel on the photoplot itself. (B) SU-8 channel produced from the section of photoplot shown in (A). (C) 100- $\mu\text{m}$ -wide SU-8 channel created using a glass photomask. Channel heights are 25  $\mu\text{m}$ .
